# Supplementary material for: Design of Disruptors of the Hsp90–Cdc37 Interface
Source: PubMed Central journal article supplement (PMC7024268; doi:10.3390/molecules25020360), 2020-01-15
Supplement: molecules-25-00360-s001.pdf [file molecules-25-00360-s001.pdf]

## Design of disruptors of the Hsp90-Cdc37 interface.

Ilda D'Annessa, Naama Hurwitz, Valentina Pirota, Giovanni Luca Beretta, Stella Tinelli, Mark Woodford, Mauro Freccero, Mehdi Mollapour, Nadia Zaffaroni, Haim Wolfson,\* Giorgio Colombo\*

### UPLC characterization ( $\lambda = 210$ nm, method B)

Cdc37p1:

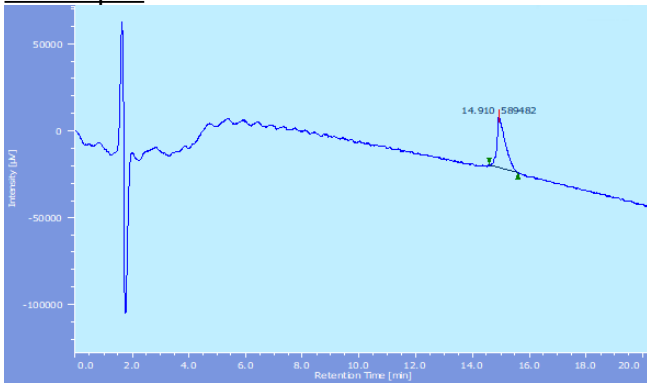

Cdc37p2:

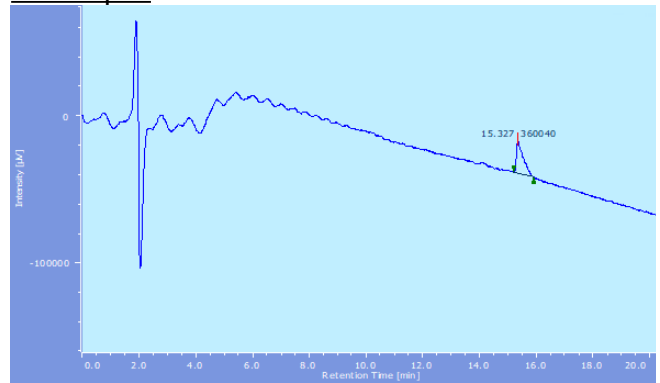

Cdc37p3:

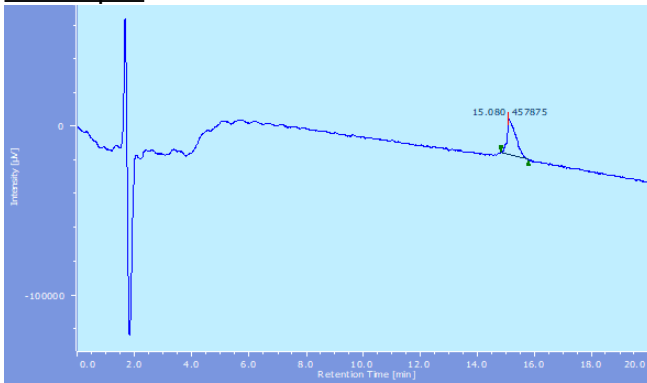

Cdc37p4:

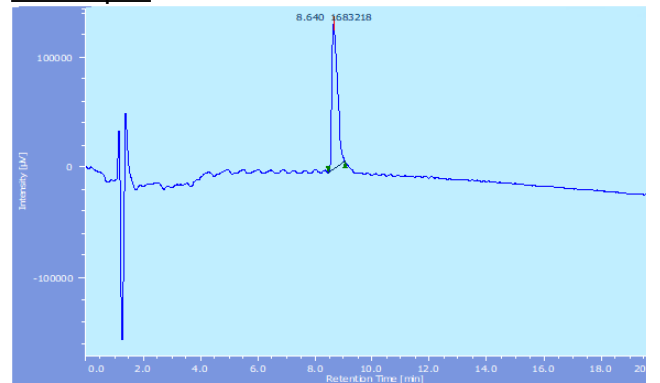

Cdc37p5:

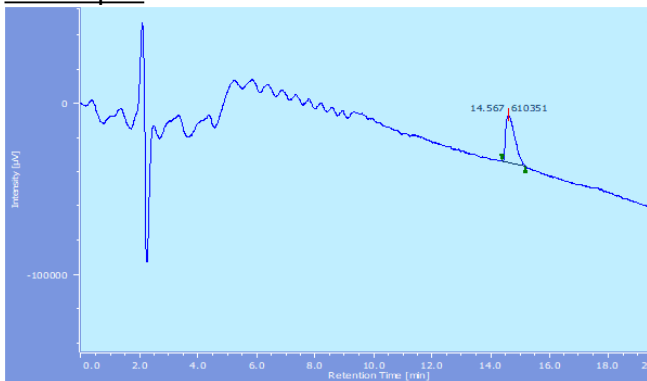

# ESI-MS characterization

## Cdc37p1

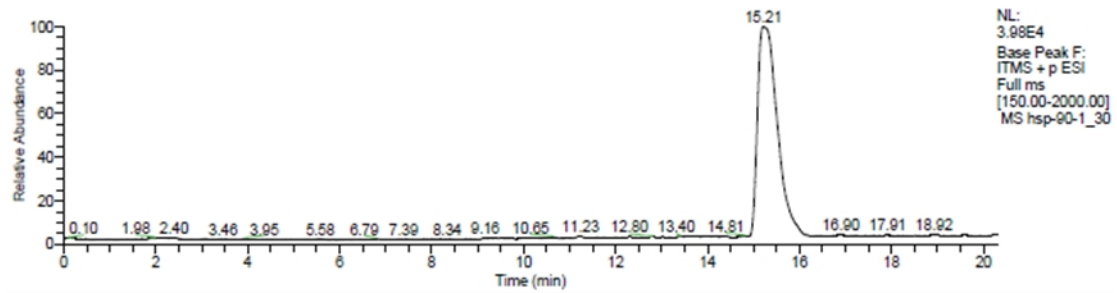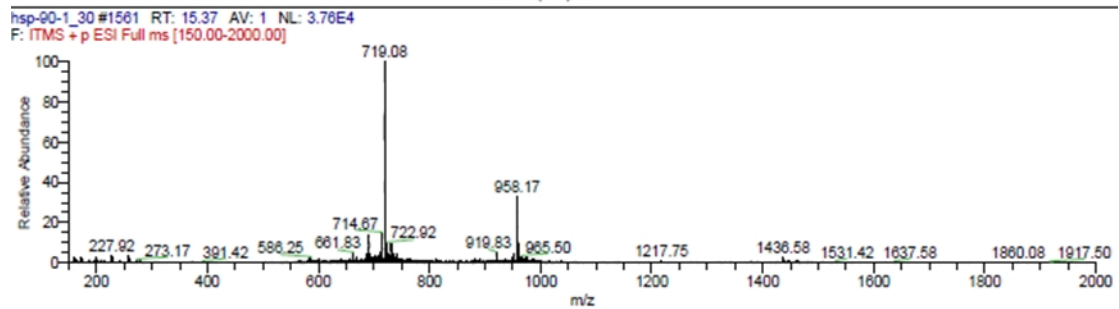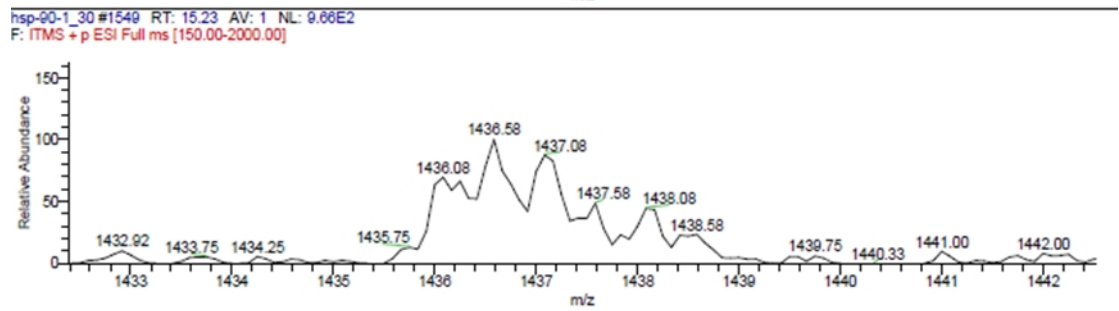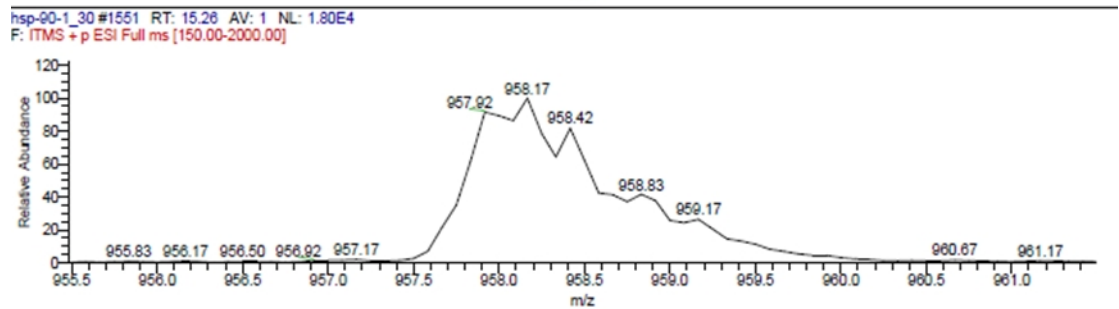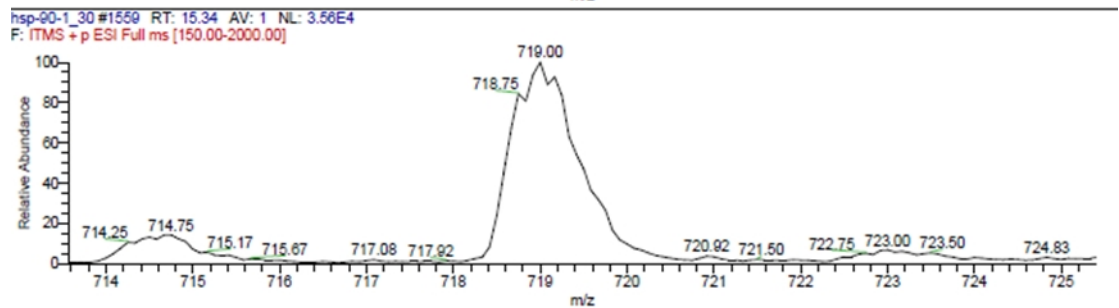

# Cdc37p2

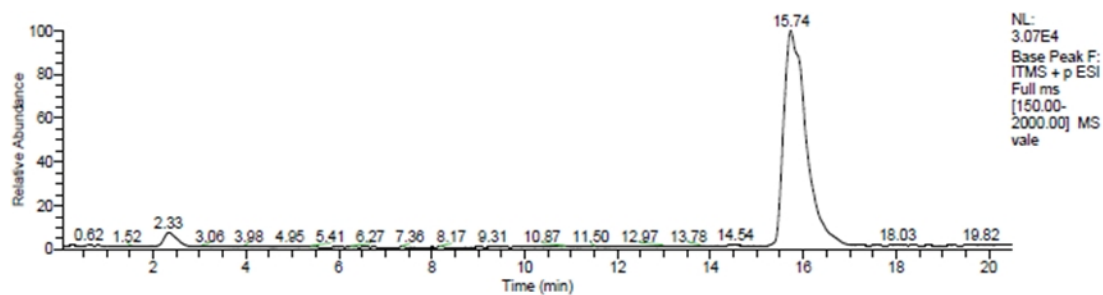

Peak #1485 RT: 15.76 AV: 1 NL: 3.22E4  
ITMS + p ESI Full ms [150.00-2000.00]

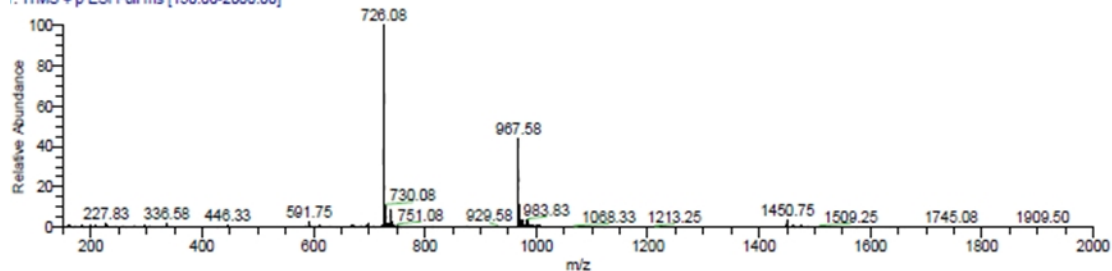

Peak #1489 RT: 15.81 AV: 1 NL: 8.37E2  
ITMS + p ESI Full ms [150.00-2000.00]

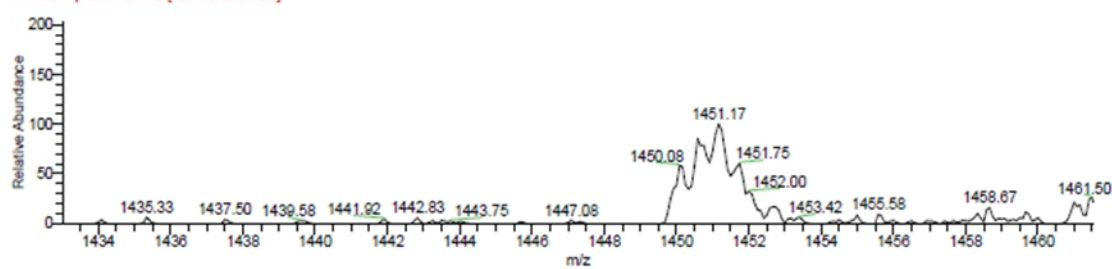

Peak #1477 RT: 15.68 AV: 1 NL: 1.33E4  
ITMS + p ESI Full ms [150.00-2000.00]

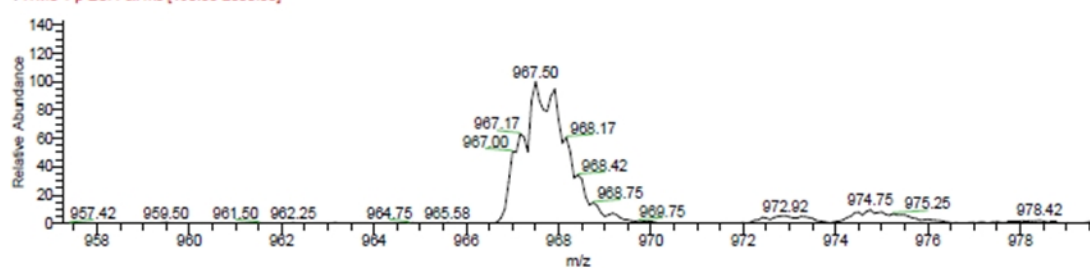

Peak #1507 RT: 16.01 AV: 1 NL: 1.82E4  
ITMS + p ESI Full ms [150.00-2000.00]

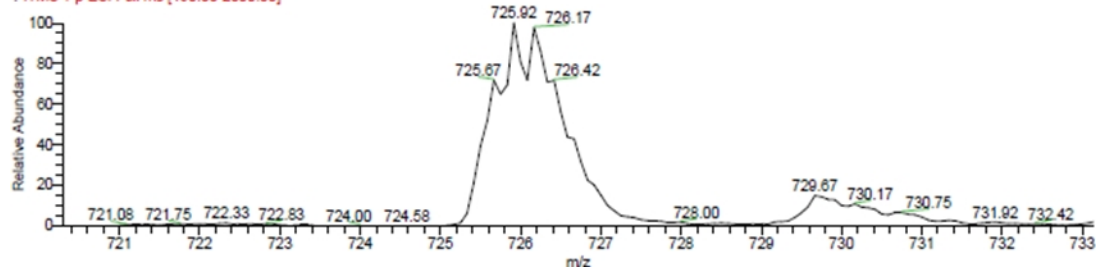

# Cdc37p3

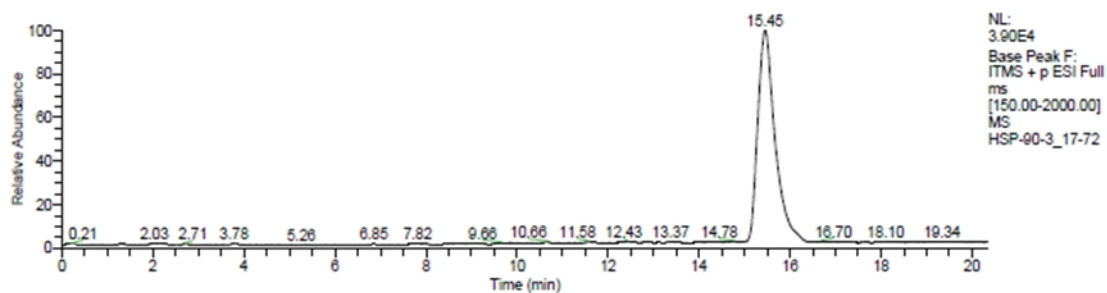

HSP-90-3\_17-72 #1425 RT: 15.65 AV: 1 NL: 2.39E4  
ITMS + p ESI Full ms [150.00-2000.00]

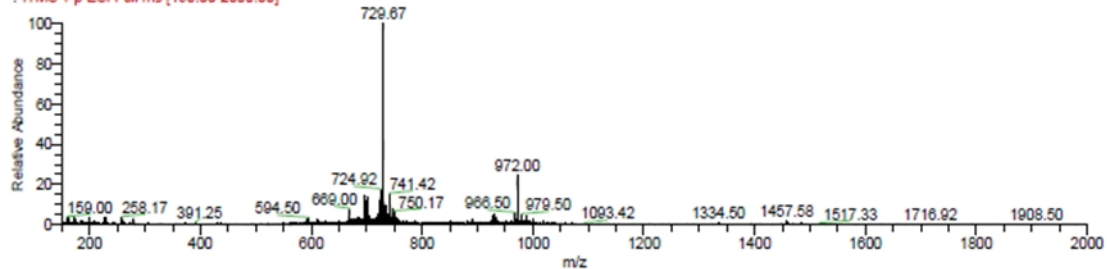

HSP-90-3\_17-72 #1413 RT: 15.61 AV: 1 NL: 8.62E2  
ITMS + p ESI Full ms [150.00-2000.00]

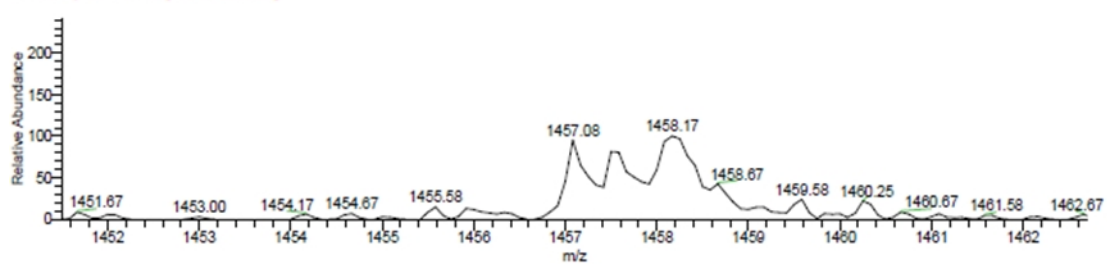

HSP-90-3\_17-72 #1411 RT: 15.49 AV: 1 NL: 1.08E4  
ITMS + p ESI Full ms [150.00-2000.00]

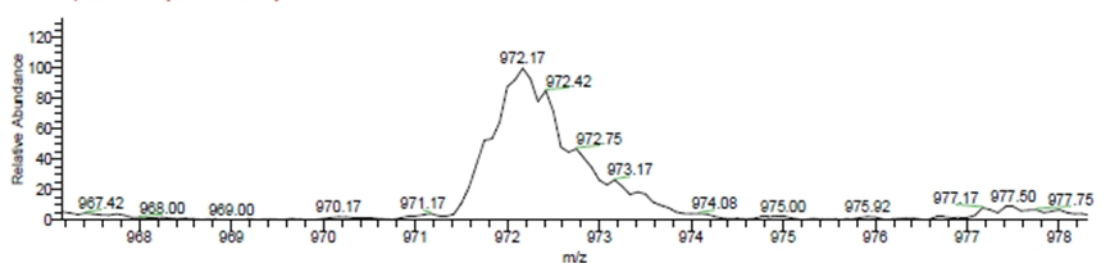

HSP-90-3\_17-72 #1431 RT: 15.72 AV: 1 NL: 1.45E4  
ITMS + p ESI Full ms [150.00-2000.00]

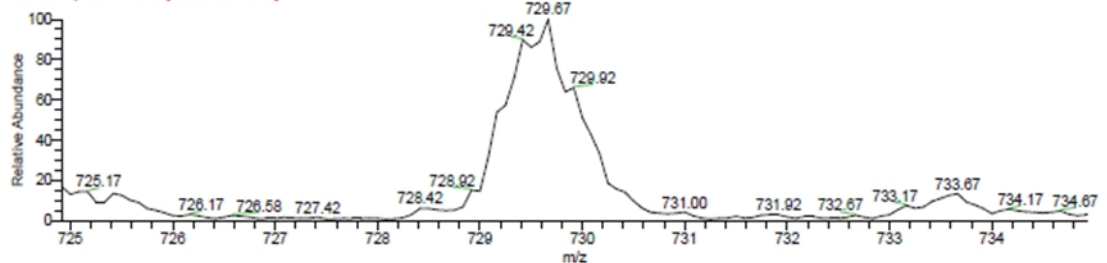

# Cdc37p4

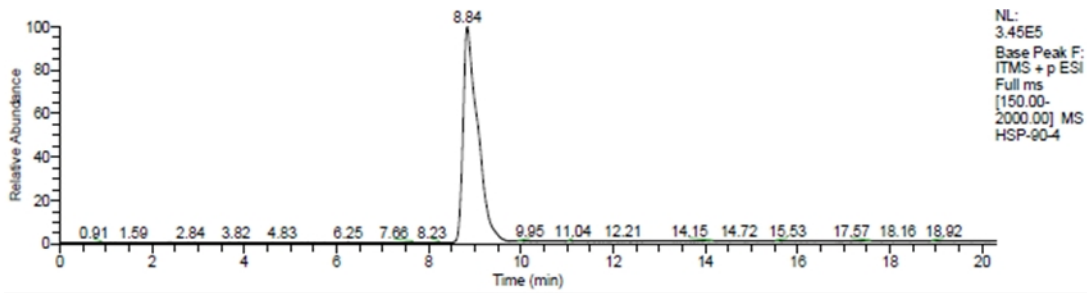

HSP-90-4 #895 RT: 8.82 AV: 1 NL: 4.01E5

F: ITMS + p ESI Full ms [150.00-2000.00]

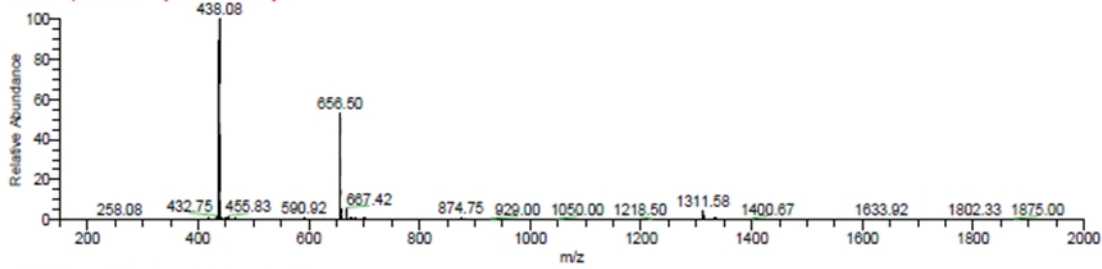

HSP-90-4 #895 RT: 8.82 AV: 1 NL: 1.90E4

F: ITMS + p ESI Full ms [150.00-2000.00]

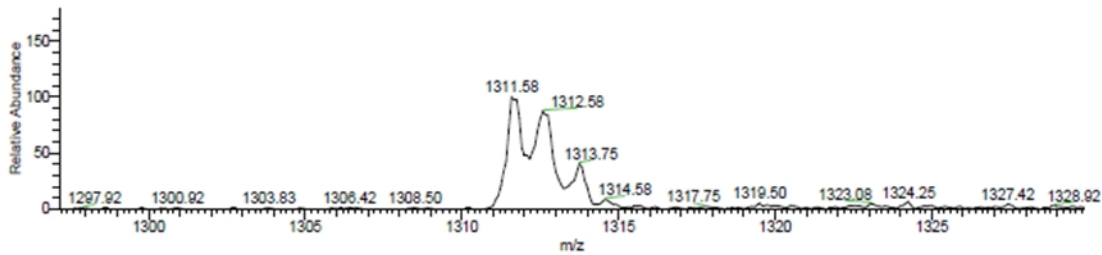

HSP-90-4 #905 RT: 8.92 AV: 1 NL: 2.07E5

F: ITMS + p ESI Full ms [150.00-2000.00]

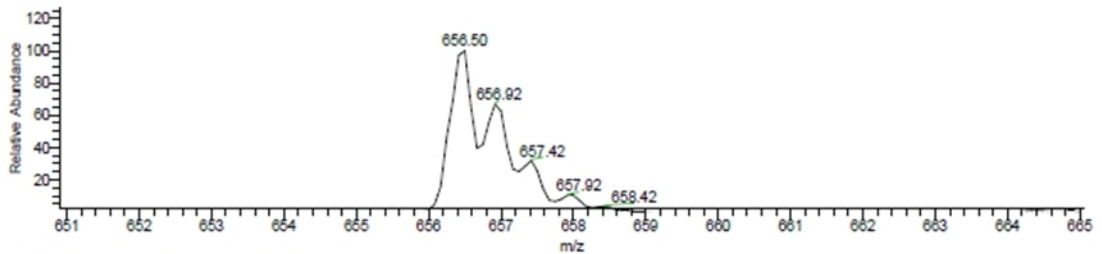

HSP-90-4 #911 RT: 8.97 AV: 1 NL: 1.71E5

F: ITMS + p ESI Full ms [150.00-2000.00]

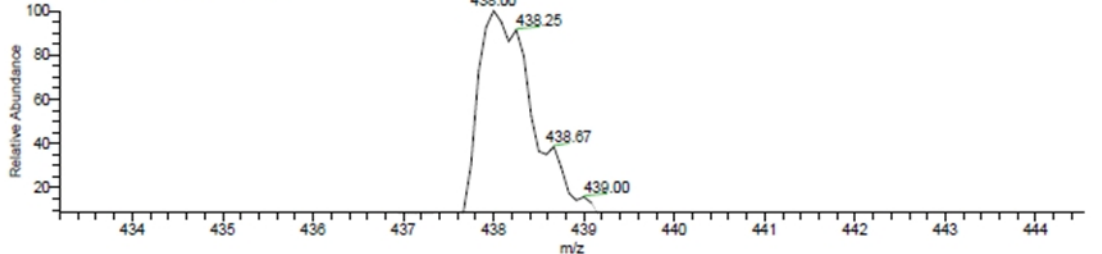

# Cdc37p5

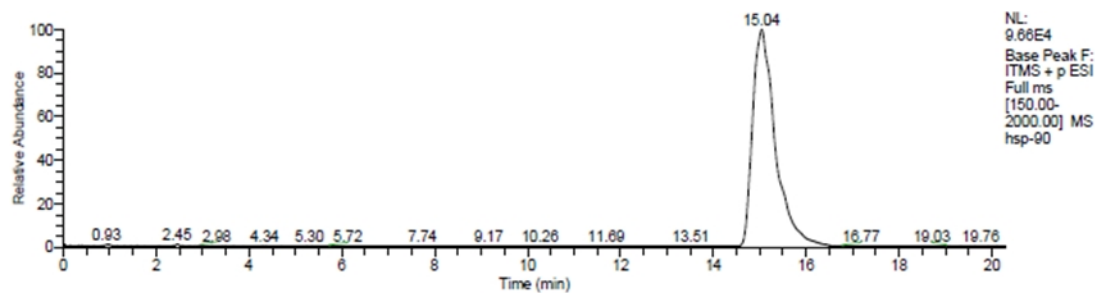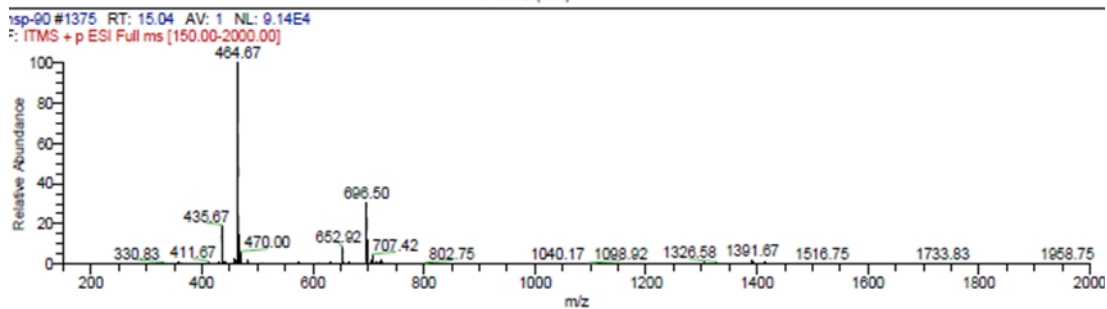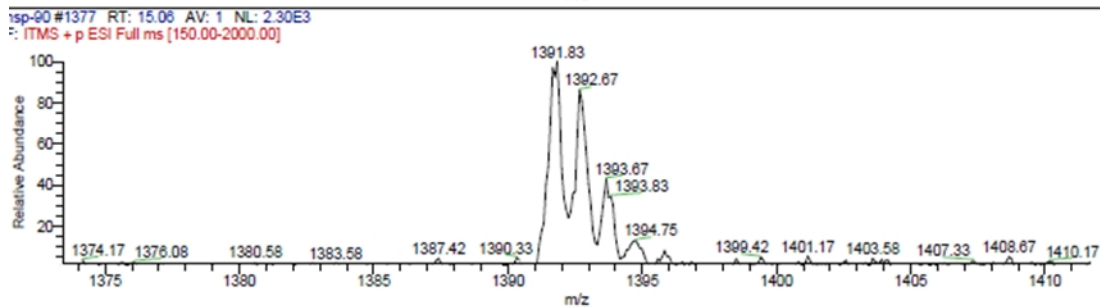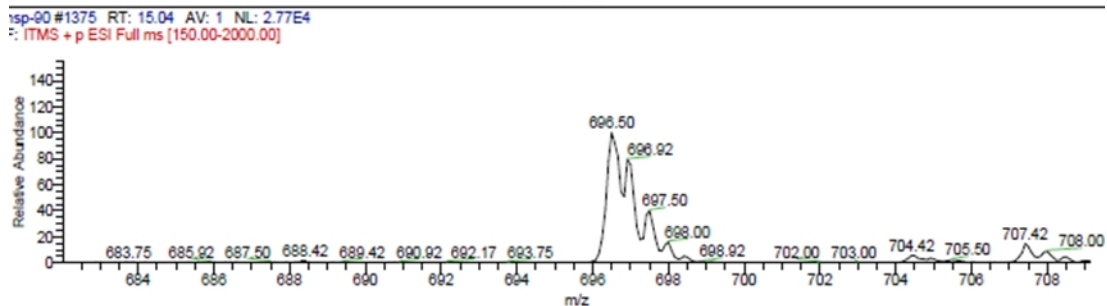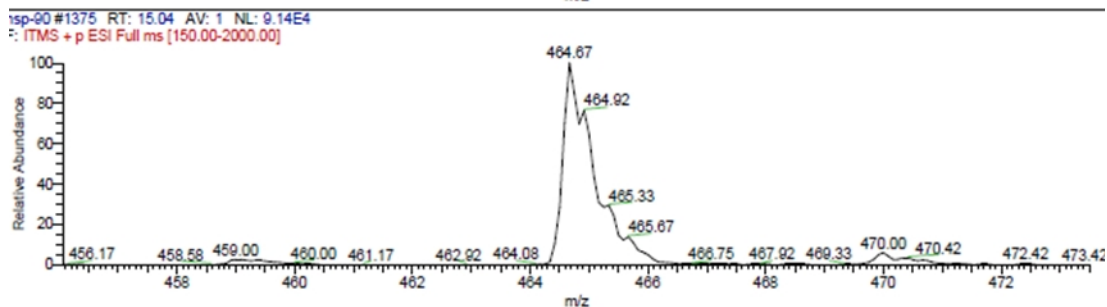

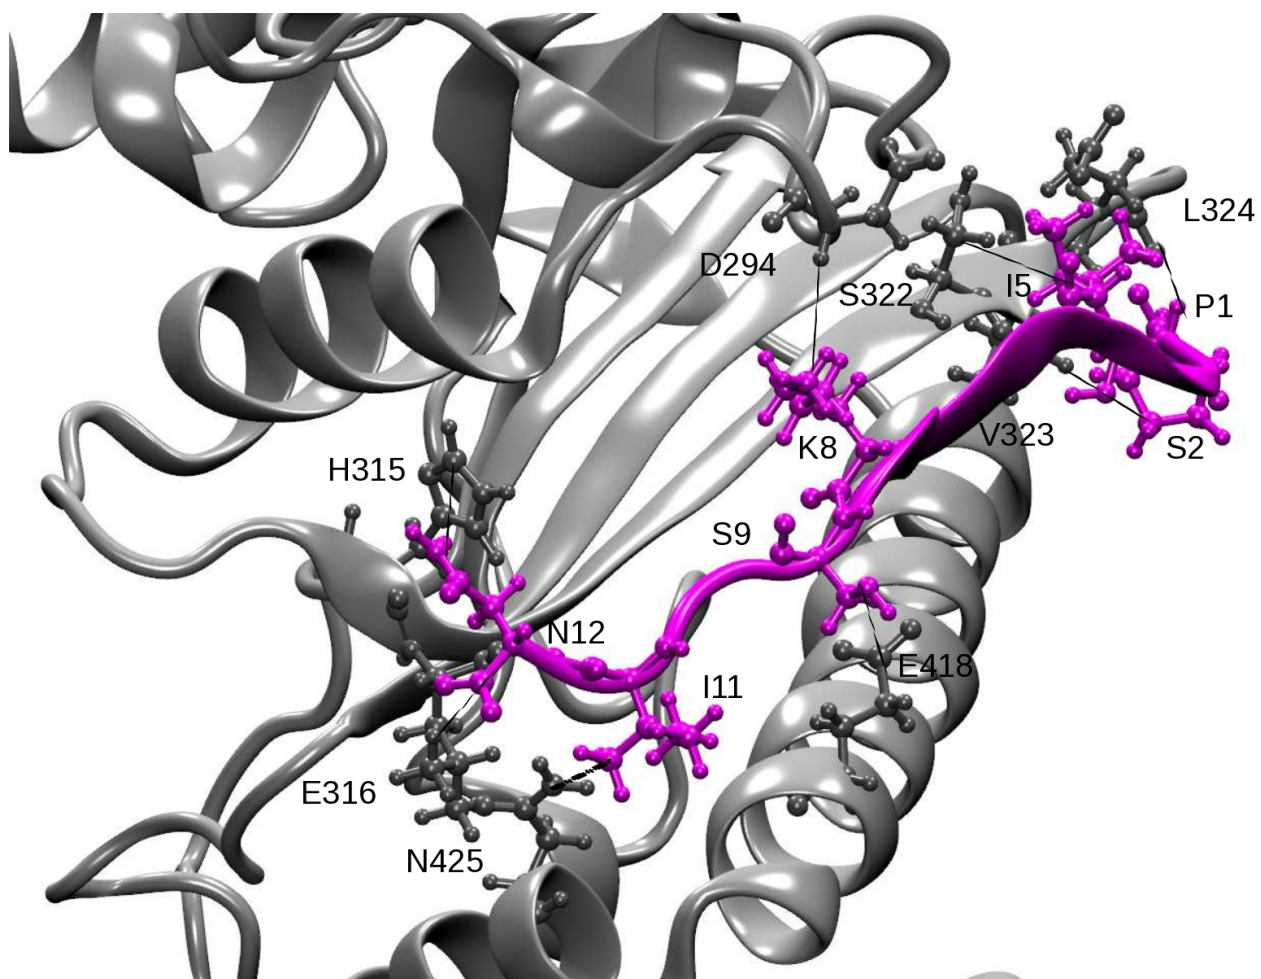

**Figure S1.** Map of the hydrogen bonds network between Hsp90 (light grey) and the newly designed peptide Cdc37p5 (magenta) as detected along molecular dynamics simulation of the Hsp90-Cdc37p5 complex.
